# Supplementary material for: Sun Exposure during Water Sports: Do Elite Athletes Adequately Protect Their Skin against Skin Cancer?
Source: Int J Environ Res Public Health. 2021 Jan 19;18(2):800. doi: 10.3390/ijerph18020800 (PMC7832317; doi:10.3390/ijerph18020800)
Supplement: Supplementary file 1 [file ijerph-18-00800-s001.pdf]

# SUN PROTECTION INVESTIGATION

Final core items – ADULTS

For each question listed, please select the one answer that is the best response to the question.

Male ☐ Female ☐

Age

Years in windsurf competition :

## Section 1. Sun habits.

**1. In the summer, on average, how many hours are you outside per day between 10 AM and 4 PM... on weekdays (Monday-Friday)?**

- |                            |                       |               |                       |
|----------------------------|-----------------------|---------------|-----------------------|
| 30 minutes or less .....   | <input type="radio"/> | 4 hours ..... | <input type="radio"/> |
| 31 minutes to 1 hour ..... | <input type="radio"/> | 5 hours ..... | <input type="radio"/> |
| 2 hours .....              | <input type="radio"/> | 6 hours ..... | <input type="radio"/> |
| 3 hours .....              | <input type="radio"/> |               |                       |

**2. In the summer, on average, how many hours are you outside per day between 10 AM and 4 PM... on weekend days (Saturday & Sunday)?**

- |                            |                       |               |                       |
|----------------------------|-----------------------|---------------|-----------------------|
| 30 minutes or less .....   | <input type="radio"/> | 4 hours ..... | <input type="radio"/> |
| 31 minutes to 1 hour ..... | <input type="radio"/> | 5 hours ..... | <input type="radio"/> |
| 2 hours .....              | <input type="radio"/> | 6 hours ..... | <input type="radio"/> |
| 3 hours .....              | <input type="radio"/> |               |                       |

**3. In the past 12 months, how many times did you have a red OR painful sunburn that lasted a day or more?**

- 0 ☐ 1 ☐ 2 ☐ 3 ☐ 4 ☐ 5 or more ☐

**For the following questions, think about what you do when you are outside during the summer on a warm sunny day.**

- |                                                                             | Never                 | Rarely                | Sometimes             | Often                 | Always                |
|-----------------------------------------------------------------------------|-----------------------|-----------------------|-----------------------|-----------------------|-----------------------|
| 4. How often do you wear <b>SUNSCREEN</b> ?                                 | <input type="radio"/> |
| 5. How often do you wear a <b>SHIRT WITH SLEEVES that cover shoulders</b> ? | <input type="radio"/> |
| 6. How often do you wear a <b>HAT</b> ?                                     | <input type="radio"/> |
| 7. How often do you stay in the <b>SHADE or UNDER AN UMBRELLA</b> ?         | <input type="radio"/> |
| 8. How often do you wear <b>SUNGLASSES</b> ?                                | <input type="radio"/> |
| 9. How often do you spend time in the sun in order to get a tan?            | <input type="radio"/> |

**10. What is the color of your untanned skin?**

- Very fair ..... ☐
- Fair ..... ☐
- Olive ..... ☐
- Light brown ..... ☐
- Dark brown ..... ☐
- Very dark ..... ☐

## Section 2. Skin examination.

**11. Have you EVER had your skin checked for skin cancer from head to toe by a health professional?**

- No ..... ☐ (Skip to question 13)
- Yes ..... ☐

**12. If Yes, what is the month and year when you last had your skin checks from head to toe?**

Month  / Year

**13. In the last 12 months, have you or a partner examined your entire body, including your back, for skin cancer?**

- No ..... ☐
- Yes ..... ☐

**14. If Yes, how many times?**

## Section 3. Windsurf habits.

**15. On average, how many hours a day do you practise windsurfing?**

**16. When you are practise windsurfing, do you usually use sunscreen on your face?**

- No ..... ☐
- Yes ..... ☐

17. When you use suscreen, ĩsun protection factor (SPF) used is 30 or more? No ..... Yes.....

18. Do you re-apply sunscreen? No ..... Yes.....
